# Supplementary material for: The e-Autopsy/e-Biopsy: a systematic chart review to increase safety and diagnostic accuracy
Source: publisher site journal article supplement (doi:10.1515/dx-2022-0083), 2022-09-24
Supplement: Supplementary file 1 [file j_dx-2022-0083_suppl.docx]

**Appendix**

Appendix 1: Ectopic Pregnancy Review Tool - Questions for Ob/Gyn Physicians

| **Questions** | **Pre-populated answers** |
| --- | --- |
| 1. Study ID | Free text |
| 2. Chart Reviewer | Free text |
| 3. Was the patient considered a possible ectopic for inclusion in the study? (If not a true Ectopic Pregnancy case, stop the review and select another case from the list) | - Yes - No |
| 4. Was there any history consistent with a miscarriage? | - Yes - No |
| 5. Did the patient present with pain? | - Yes - No - Other (enter comments) |
| 6. Did the patient present with bleeding? | - Yes - No - Other (enter comments) |
| 7. Was an ultrasound done initially? | - Yes - No - Other (enter comments) |
| 8. If an ultrasound was done initially (Question 7=yes), did it clearly show an ectopic pregnancy? | - Yes - No - Other (enter comments) |
| 9. If an ultrasound was done initially, did it clearly show an intrauterine pregnancy? | - Yes - No - Other (enter comments) |
| 10. If an ultrasound was done initially, was it non-diagnostic? | - Yes - No - Other (enter comments) |
| 11. If the ultrasound was non-diagnostic, was an HCG ordered with a follow up in 48 hours? | - Yes - No - Not Applicable - Other (enter comments) |
| 12. If no to question 11, an HCG ordered with a follow up in 48 hours after non-diagnostic, please explain. Otherwise, skip. | Free text |
| 13. If the initial quantitative HCG test was >3000 and Intrauterine pregnancy was not identified on ultrasound, was the patient offered surgical or medical treatment at that time, per attached guidelines, before the repeat value? | - Yes - No - Other (enter comments) |
| 14. Did the second HCG show an increase over >66%? | - Yes - No - Other (enter comments) |
| 15. If yes to question 16 (second HCG showed an increase over > 66%), was a repeat ultrasound ordered? | - Yes - No - Not Applicable - Other (enter comments) |
| 16. Did the second HCG show an increase less than <66%? | - Yes - No - Other (enter comments) |
| 17. If yes to question 18 (HCG showed an increase less than < 66%), was a repeat ultrasound ordered? | - Yes - No - Other (enter comments) |
| 18. If yes to question 18 (HCG showed an increase less than < 66%), was an endometrial biopsy done? | - Yes - No - Other (enter comments) |
| 19. Was Methotrexate ordered and administered to the patient? | - Yes - No - Other (enter comments) |
| 20. Was surgery performed on the patient to treat the ectopic pregnancy? | - Yes, please explain below - No |
| 21. If yes to surgery performed on patient to treat the ectopic pregnancy, please explain. | Free text |
| 22. Was there a possible delay in written communication of results and treatment plan to the patient? | - Yes - No - Other (enter comments) |
| 23. If yes, there was a possible delay in written communication of results and treatment plan to the patient, explain. | Free text |
| 24. If the patient was Rh(-) were they given Rhogam according to guidelines? | - Yes - No - Other (enter comments) |
| 25. If the patient was Rh(-) and not given Rhogam according to guidelines, please explain. | Free text |
| 26. Were there other areas of care from an Ob/Gyn perspective that could have been improved, according to guidelines? | - Yes - No - Other (enter comments) |
| 27. If yes to other areas of care from an Ob/Gyn perspective that could have been improved, according to guidelines, please explain. | Free text |
| 28. Was the differential diagnosis documented anywhere? | - Yes - No - Other (enter comments) |
| 29. Was the plan of management documented? | - Yes - No - Other (enter comments) |
| 30. Briefly summarize Ob/Gyn patient story. | Free text |

Appendix 2: Ectopic Pregnancy Review Tool - Pre Ob/Gyn Care Questions

| **Questions** | **Pre-populated Answers** |
| --- | --- |
| 1. Study ID | Free text |
| 2. Chart Reviewer | Free text |
| 3. Is this case eligible for the study? (If not a true Ectopic Pregnancy case, stop the review and select another case from the list) | - Yes - No - Other (enter comments) |
| 4. Did the patient have one or more Primary Care, UC or ED visits related to Ectopic Pregnancy diagnosis prior to the diagnosis of ectopic pregnancy? | - Yes - No - Other (enter comments) |
| 5. If yes to question 4, type in number of Primary Care, UC, or ED Visits related to Ectopic Pregnancy. | Free text |
| 6. Was there a possible delay in ordering a pregnancy test based on symptoms and patient characteristics? | - Yes - No - Other (enter comments) |
| 7. If yes to possible delay in ordering a pregnancy test based on symptoms and patient characteristics, please explain. | Free text |
| 8. Was a there a delay in ordering a quantitative HCG test per guidelines? | - Yes - No - Other (enter comments) |
| 9. If yes to delay in ordering a quantitative HCG test per guidelines, please explain. | Free text |
| 10. Was there a delay in ordering an ultrasound per guidelines? | - Yes - No - Other (enter comments) |
| 11. If yes to question 10, delay in ordering an ultrasound per guidelines, please explain. | Free text |
| 12. Was there possible delay in consideration of ectopic pregnancy in the differential? | - Yes - No - Other (enter comments) |
| 13. If yes to a possible delay in consideration of ectopic pregnancy in the differential, please explain. | Free text |
| 14. Was there evidence of a possible delay in appropriate follow-up that was related to the day of the week? | - Yes - No - Other (enter comments) |
| 15. If yes to evidence of a possible delay in appropriate follow-up that was related to the day of the week, please explain. | Free text |
| 16. Was there a possible delay in Ob/Gyn communication (including phone call, consultation, or referral to Ob/Gyn case manager) in the care of the patient? | - Yes - No - Other (enter comments) |
| 17. If yes to a possible delay in Ob/Gyn communication (including phone call, consultation, or referral to Ob/Gyn case manager) in the care of the patient, please explain. | Free text |
| 18. Was there a possible delay in written communication of results and plan to the patient upon discharge? | - Yes - No - Other (enter comments) |
| 19. If yes, was there a possible delay in written communication of results and plan to the patient upon discharge, please explain. | Free text |
| 20. Was the patient tested for Rh antigen? | - Yes - No - Other (enter comments) |
| 21. If the patient was RH(-), was the patient given Rhogam according to guidelines? | - Yes - No - Other (enter comments) |
| 22. If the patient was RH(-) and not given Rhogam according to guidelines, please explain why. | Free text |
| 23. Were there other areas of care (not evaluated in above questions) that could have been improved from a Primary Care/ ED/ UC perspective prior to Ob/Gyn referral? | - Yes - No - Other (enter comments) |
| 24. If yes to other areas of care (not evaluated in above questions) that could have been improved from a Primary Care/ ED/ UC perspective prior to Ob/Gyn referral, please explain. | Free text |
| 25. Briefly summarize the story of the care by the non-Ob/Gyn practitioner and highlight any opportunities for learning. | Free text |

Appendix 3: AAA Review Tool

| **Q#** | **Questions** | **Pre-populated answers** |
| --- | --- | --- |
| 1a | Did the patient have a known life-limiting disease, for which a Hospice/ Home Based Palliative Care (HBPC) referral would have been appropriate? (Select one answer from the drop-down box) | - Pt did not have a known life-limiting disease. - Pt was a Hospice pt prior to admission - Pt was a Home-Based Palliative care (HBPC) prior to admission. - Hospice referral occurred during hospitalization - HBPC referral occurred during hospitalization - NO Hospice referral during hospitalization - NO HBPC referral during hospitalization - Pt refused hospice referral. - Pt refused HBPC referral. |
| 1b | Describe detail about known life-limiting disease and Hospice/ HBPC referral | Free text |
| 2a | Was an Inpatient Palliative Care (IPC) consultation referral initiated? (Select one) | Pt was not an Inpatient Palliative Care (IPC) candidate.  Referral was made within 24 hrs. of admission  Referral was made 25- 72 hrs. of admission  Referral was made > 72 hrs. of admission |
| 2b | Describe detail about Inpatient Palliative Care (IPC) and referral | Free text |
| 3a | Did the pt have an Advance Directive and/or Physician Order for Life Sustaining Treatments (POLST) on chart? (Select one) | - Advance Directive Yes & POLST Yes - Advance Directive No & POLST No - Advance Directive Yes & POLST No - Advance Directive No & POLST Yes |
| 3b | Is there evidence of discussion that drives appropriate Advance Care Planning - including DNR, POLST, etc. (Select one) | - Yes, the is evidence of Advance Care Planning discussion - No, the is not evidence of Advance Care Planning discussion - Not Applicable |
| 4 | Was this a hospital readmission, within 30 days? (Select one) | - Yes, readmission from same KP Med Center - Yes, readmission from different KP Med Center - Yes, readmission from non KP Med Center - No |
| 5a | Was there evidence of aspiration pneumonia during this admission? (Select one) | - No aspiration pneumonia - Yes, aspiration occurred, not related to any tubes - Yes, aspiration from ET tube - Yes, aspiration from NG tube - Yes, aspiration from GT tube - Yes, aspiration with Tracheostomy tube - Yes, aspiration from 2 or more tubes, please describe below |
| 5b | Please describe: "aspiration from 2 or more tubes". | Free text |
| 5c | Rate the severity of this aspiration event. (Select one) | - No Aspiration - Minor harm – transient, did not extend stay - Serious harm – extended stay or required aggressive resuscitation - Harm may have contributed to death |
| 6a | Was there evidence of any medication event during this admission? (Select one) | - No medication event - Medication interaction - Adverse medication event - Med prescribing related event - Med dispensing related event - Med administration related event - Med monitoring related event |
| 6b | Rate the severity of this medication event (Select one) | - NA - Minor harm – transient, did not extend stay - Serious harm – extended stay or required aggressive resuscitation - Harm may have contributed to death |
| 6c | Notes on medication event | Free text |
| 7a | Was there evidence of any surgical / procedural harm event? (Select one) | - No event related to surgical/ procedural - Pre-op/ procedural event - Intra-op/ procedural event - Post-op/ procedural event - Infection related to surgical/ procedure - Excessive bleeding post-surgical/ procedure - PE post-surgical/ procedure - Consent issue - Other |
| 7b | Rate the severity of this surgical/ procedural event (Select one) | - NA - Minor harm – transient, did not extend stay - Serious harm – extended stay or required aggressive resuscitation - Harm may have contributed to death |
| 7c | Notes on surgical/ procedural event | Free text |
| 8a | Was there evidence of Failure to Plan? (Select one) | - No - Treatment related - End Of Life and treatment related - End Of Life care planning related - Other |
| 8b | Rate the severity of Failure to Plan. (Select one) | - NA - Minor harm – transient, did not extend stay - Serious harm – extended stay or required aggressive resuscitation - Harm may have contributed to death |
| 8c | Notes on Failure to Plan | Free text |
| 9a | Was there evidence of Failure to Rescue? (Select one) | - No evidence of Failure to Rescue - Yes, Failure to note significant changes in Symptoms, Signs, Vital Signs, neurological changes, etc. that were not responded to in a timely manner. - Yes, Post Operative complication not recognized in a timely manner - Other Failure to Rescue (requires description below) |
| 9b | Rate the evidence of Failure to Rescue (select one)  . | - NA - Minor harm – transient, did not extend stay - Serious harm – extended stay or required aggressive resuscitation - Harm may have contributed to death |
|  |
| 9c | Notes on Failure to Rescue (free text) | Free text |
| 10a | Was there evidence of Failure to Communicate? (Select one) | - No evidence of Failure to Communicate - Yes, Hand Off (change of shift, transfer of care, Peri-operative, etc.) issue. - Yes, Critical Lab/Result reporting issue. - Yes, Patient/Family/Literacy Issues - Yes, Cultural Competency issue. - Medication Reconciliation issue. - Other (requires description below) |
| 10b | Rate evidence of Failure to Communicate (Select one) | - NA - Minor harm – transient, did not extend stay - Serious harm – extended stay or required aggressive resuscitation - Harm may have contributed to death |
| 10c | Notes on Failure to Communicate (free text) | Free text |
| 11a | Did the patient have an obvious clinical finding that was missed, leading to a preventable harm or death?  (Select one) | - Yes (requires description below) - No |
| 11b | Notes on missed clinical findings (free text) | Free text |
| 12 | Other findings – use this space to capture any observations such as system issues not identified above such as KPHealthConnect issues, documentation issues, etc. Please be specific to allow referrals for system improvements (free text) | Free text |
| 13 | Was there evidence of infection present on admission? (Select one) | - No infection present or incubating on admission - Yes, originated at Home. - Yes, originated in SNF/Custodial - Yes, originated in an Acute Care Facility (describe in 19. below) - Unknown / Other |
| 14a | For patients with diagnosis of sepsis, was there any recent (within 2 weeks) visit prior to this inpatient admission with possible early infection that may have progressed to sepsis? (Select one) | - No diagnosis of sepsis - Yes, diagnosis of Sepsis; No recent visit with possible early infection - Yes, diagnosis of Sepsis; Yes, recent visit with possible early infection (describe in 14b below) |
| 14b | Notes on recent visit with possible early infection | Free text |
| 14c | For patients with diagnosis of sepsis, was there Failure to Recognize the significance of infection prior to this inpatient stay? (Select one) | - No diagnosis of sepsis - Yes, diagnosis of Sepsis, No Failure to Recognize significance of prior infection - Yes, diagnosis of Sepsis, Yes Failure to Recognize significance of prior infection, please describe below |
| 14d | Notes on Failure to Recognize the significance of infection prior to this inpatient stay. | Free text |
| 15a | Was there evidence that the pt had a Hospital Associated Infection (HAI) during this admission? (Select one) | - Central line-associated (CLBSI) - ventilator-associated pneumonia (VAP) - Catheter-associated UTI (CAUTI) - Surgical site infection (SSI) exclude bone or joint - Surgical site infection (SSI) specific to Bone or Joint - *Clostridium difficile* infection - No HAI - OTHER (requires description below) |
| 15b | Notes on HAI, if applicable, please state in what level of care HAI occurred. | Free text |
| 16 | MISC NOTES for any area above that needs clarification, please include item number | Free text |
| 20 | Please give a narrative summary of this case in approximately 50 words – no staff, Med Center or pt identifiers. | Free text |

Appendix 4: Colon Cancer Review Tool

| **1. Screening** |
| --- |
| **1a. Screening; Advanced Age:** If patient diagnosed with CRC > age 75, was CRC screening done prior to age 75? (Evidence of non KP screening should be counted) |
| **1b. Screening; Delayed Opportunities:** Number of years patient was a member of KP prior to diagnosis of CRC. Skip if not applicable ***Text Input*** |
| **1c. Screening; Delayed Opportunities:** Number of years patient was a member of KP and met screening criteria or was symptomatic prior to diagnosis of CRC (***text input)***. Please add comments if patient had complicated KP history or note if patient was diagnosed prior to coming to KP (**use 1e for comments**). |
| **1d. Screening; Increased Genetic Risk:** If patient was diagnosed with CRC before age 50 was evaluation done for increased genetic risk? |
| **1e. Comments Text *Input*** |
| **2. Medical Treatment** |
| **2a. Medical Treatment; Adjuvant Chemotherapy in Stage 3:** Was Adjuvant chemotherapy offered/given for node positive (AKA stage 3) Colon Cancer? |
| **2b. Medical Treatment; Adjuvant Chemo in High-Risk Stage 2:** Was Adjuvant chemotherapy offered/given for high-risk stage 2 Colon Cancer (an option for: poorly differentiated, lymphatic, or vascular invasion, positive margins, less than 12 lymph nodes removed, perforation, T3 tumor through the muscularis). |
| **2c. Medical Treatment; Informed Refusal of Adjuvant Chemotherapy:** If Adjuvant chemotherapy was indicated and not given for high-risk stage 2 or Stage 3 colon cancer, was there adequate documentation of ‘informed refusal’. |
| **2d. Medical Treatment; Treatment Adverse Effects:** Were there side effects/toxicity from chemotherapy that resulted in serious morbidity or mortality? |
| **2e. Multidisciplinary CRC Tumor Board:** Was patient appropriately referred to MCRCTB? |
| **2f. Comments *Text Input*** |
| **3. Surgical Treatment** |
| **3a. Surgical Treatment; Referral to Oncologic Surgeon:** Was a referral made to oncologic surgeon for evaluation of resectability of liver metastases? |
| **3b**. **Biopsy Margins:** If liver metastasis excision performed, were margins clear? |
| **3c**. **Comments** ***Text Input*** |
| **4. Blood Transfusion at time of surgery** |
| **4a. Blood Transfusion ordered and given?** |
| **4b. Number of Blood Transfusions:**  Enter number of units patient received at time of colon cancer surgery. (*Blood transfusion guidelines attached)* ***Text Input*** |
| **5. Post-Surgical Chemotherapy** |
| **5a. Post-Surgical Chemotherapy; timing:** If patient had surgery and subsequent chemotherapy with no obvious reasons for delay, please input number of days between surgery and start of chemotherapy. ***Text Input*** |
| **5b. Comments regarding delay in post-surgical chemotherapy. *Text Input*** |
| **6. Surveillance** |
| **6a**. **Surveillance; Colonoscopy**: Performed according to NCCN Guidelines? **Colonoscopy** **frequency** - within one year of initial treatment, then 3 years, then 5 years (sooner intervals if advanced adenomas found). |
| **6b. Surveillance; CEA:** Performed according to NCCN Guidelines? **CEA (Carcinoembryonic antigen) frequency** - every 6 months for 5 years. |
| **6c. Surveillance; CT scan:** Performed according to NCCN Guidelines? **CT scan** **chest/abdomen/pelvis** **frequency** – Annual for 5 years |
| **6d. Surveillance; Metastatic progression:**  If patient had Stage 2 cancer at diagnosis, did it metastasize during surveillance? |
| **6e. Review of Pathology slides:** If yes to question 6 d, were there discrepancies between original pathology report and reviewer’s diagnosis? |
| **6f. Comments Text *Input*** |
| **7. Surveillance - Delays** |
| **7a. Surveillance Delay Summary:**  Was there a delay in elements of surveillance for patients who developed metastatic disease? Factors that contributed to the delay during surveillance. |
| **7b. Timeliness of intervention; Referral to Oncologic Surgeon if indicated:**  If patient developed metastases during surveillance, was there a delay in referral to an oncologic surgeon? |
| **7c. Timeliness of intervention; Delay in Referral to Oncologic Surgeon:**  Please indicate delays in days from all the above questions.***Text Input.*** |
| **7d. Comments Text *Input*** |
| **8. Prophylaxis of Recurrence** |
| **8a. Prophylaxis; Aspirin:** Was patient taking Aspirin (can reduce CRC recurrence) without contraindications? |
| **8b. Prophylaxis; Vitamin D:** if Vit D measured and low, was Vit D prescribed during surveillance period? |
| **8c. Prophylaxis; Weight Loss:** If the patient's BMI is > 30 during surveillance period, was the patient referred to Health Education for weight reduction class? |
| **8d. Prophylaxis; Exercise:** Was patient encouraged to exercise appropriately during surveillance period based on guidelines to reduce CRC recurrence? |
| **8e. Comments *Text Input*** |
| **9. End of Life** |
| **9a. End of Life Discussion Documentation:** If patient had a high risk of sudden deterioration and poor prognosis, was POLST/ Advanced directive/Palliative Care/Preferred Intensity of Care documented? |
| **9b. Comments *Text Input*** |
| **10. Cause of Death** |
| **10a. Co-morbidities:** Did the patient die of potentially preventable co-morbid disease (e.g., MI, sepsis) |
| **10b.** **Comments** for 10a. Include **cause of death** for all patients if known ***Text Input*** |
| **Summary** |
| **11. Other Types of Harm:** If you identify other types of significant harm (e.g., failure to plan, failure to recognize or failure to communicate) please describe here. ***Text Input*** |
| **12.** **Patient Summary:** Please briefly summarize the patient’s story to document important aspects of their course including opportunities to improve, delays in care, unique aspects of care, errors, etc. Avoid cut and paste of large sections of text or identifying details. ***Text Input*** |
